# Supplementary material for: Ubiquitylation of BBSome is required for ciliary assembly and signaling
Source: PubMed Central journal article supplement (PMC10074118; doi:10.15252/embr.202255571), 2023-02-06
Supplement: EMBR-24-e55571-s001.pdf [file EMBR-24-e55571-s001.pdf]

# **Ubiquitylation of the Bardet-Biedl syndrome protein complex is essential for cilium assembly and signaling**

Francesco Chiuso et al.

Appendix Figures

## **Table of Contents**

Appendix Figure S1 Page 2

Appendix Figure S2 Page 3

Appendix Figure S3 Page 4

Appendix Figure S4 Page 5

Appendix Figure S5 Pages 6-10

Appendix Figure S6 Page 11



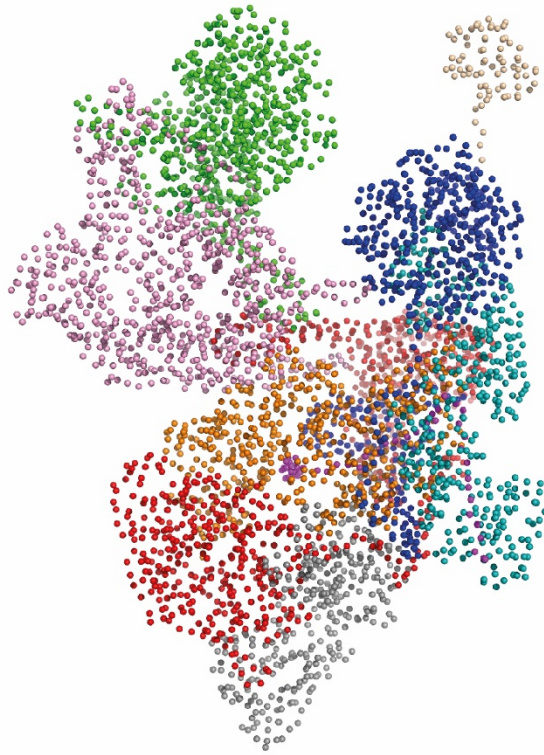

**Appendix Figure S2:** Coarse –Grained model of the Ub-hBBSome in an open conformation. Beads (BB) are shown as spheres.

A

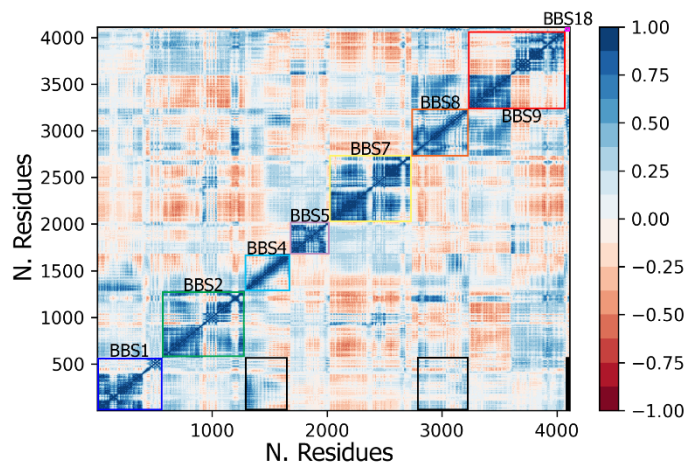

B

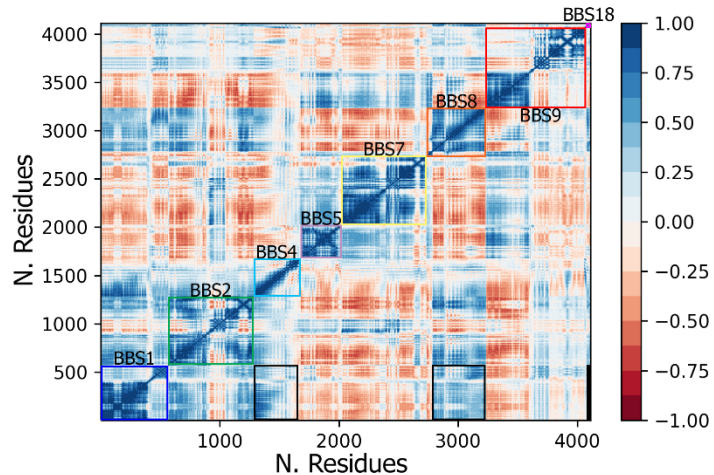

**Appendix Figure S3:** Atomic position Pearson Correlation Coefficient (aPCC) matrices calculated on **A** wt-hBBSome and **B** Ub-hBBSome after 5 $\mu$ s of CG-MD. Residues of each subunit are numbered as follows: BBS1 (S2-S568, blue rectangle), BBS2 (M570-V1285, green rectangle), BBS4 (F1288-L1683, cyan rectangle), BBS5 (M1685-S2025, light pink rectangle), BBS7 (M2026-A2740, yellow rectangle), BBS8 (M2742-F3239, orange rectangle), BBS9 (S3242-S4068, red rectangle), BBS18 (M4071-Q4122, purple rectangle). In particular, BBS18 presents a relatively high correlation ( $> 0.5$ ) with BBS4 and BBS8, which is observed only in the Ub-hBBSome model. BBS18 also has high aPCC values with BBS1 and BBS2, which correlate with each other, too. BBS1 and BBS2 anticorrelate with BBS7 (aPCC  $< -0.5$ ). The black rectangles highlight the zones showing high correlation between BBS1, BBS4, BBS8 and BBS18 in Ub-hBBSome. The same areas are also highlighted in wt-hBBSome for the sake of comparison.

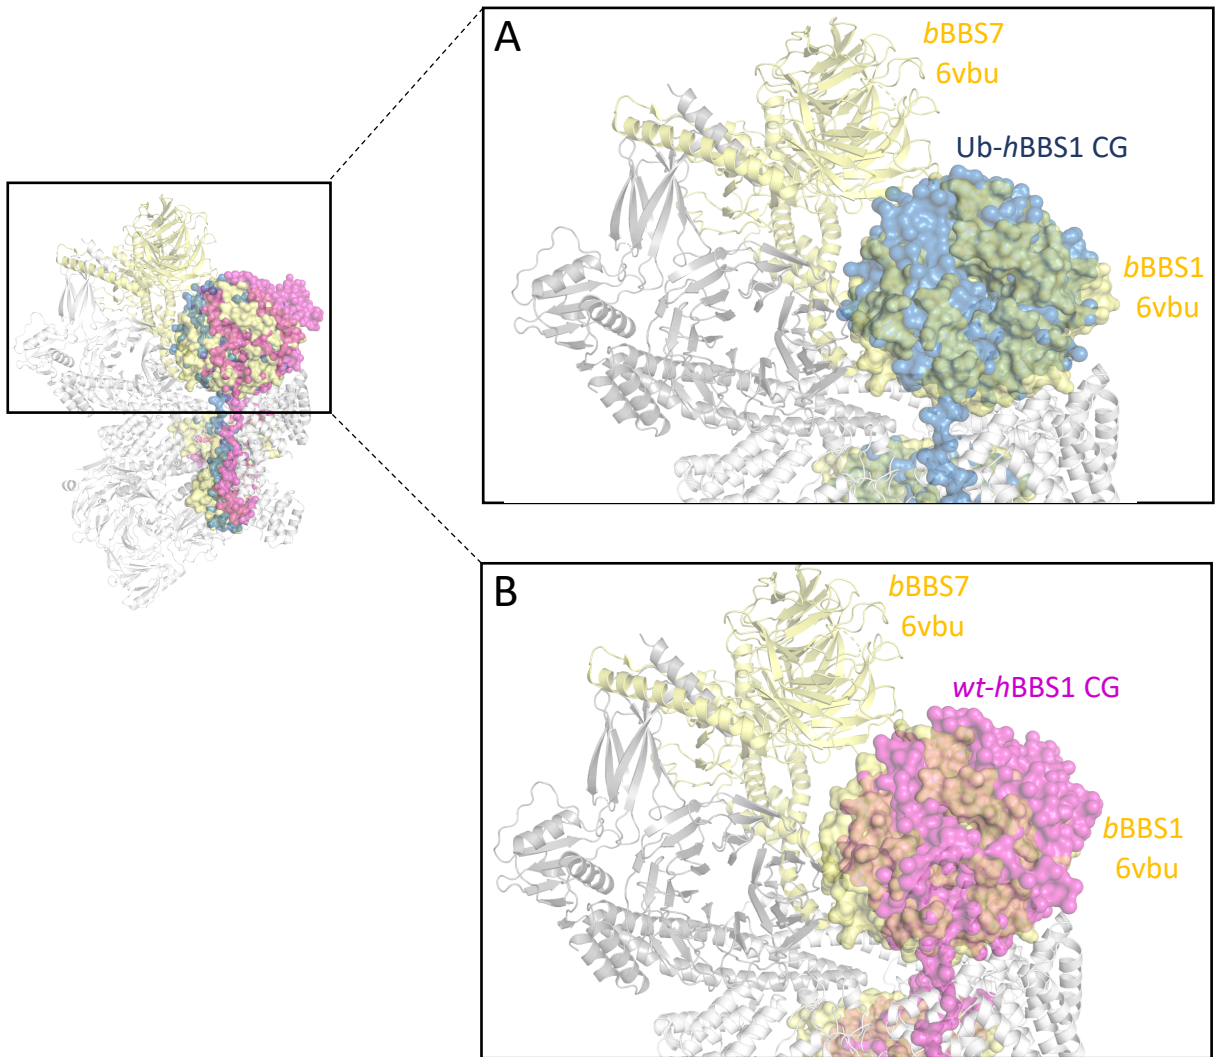

**Appendix Figure S4:** Superimposition between the bovine *bBBS1* subunit of the apo (closed) form of the Cryo-EM *bBBSome* structure (PDB ID: 6vbu) (light-yellow surface) and the last CG-MD frame of: **A** CG model of the K143 Ubiquitinated *hBBS1* (Ub-*hBBS1* CG) (light-blue surface) and **B** CG model of the wild-type *hBBS1* (wt-*hBBS1* CG) (light-magenta surface). After 5  $\mu$ s of CG-MD, a more closed conformation of the Ub-*hBBS1* CG can be observed, compared to the wt-*hBBS1* CG.

A

```

                2                               41
hBBS1  -----SKWLDAHYPMANIHTFSACLALADLHGDGEYKLVVGDGLGP
6vbu_BBS1 MAATSSSDSDGGKGESEANSKWLDSLSDSMANIHTFSACLALADLHGDGEYKLVVGDGLGP
                20                               60

                61                               82                               103
hBBS1  GGGQPRLKVLKGPLVMTESPLPALPAAAAATFLMEQHEPRTPALALASGPCVYVYKRLRPY
6vbu_BBS1 DGRQPRLKVLKGH TLVVSQKPLPDLPAAAAVTFLMASHEPRTPALALASGPCVYVYKRLRPY
                80                               100                               121

                124                               142                               162
hBBS1  FKFSLPQLPPNPLEQDLWNQAKEDRIDPLTLKEMLESIRETAEELSIQSLRFLQLELSE
6vbu_BBS1 FKFSLP SLPTNPLEQDLWNQAKEDRIDPLTLKEMLEGI REKA EVPLSVQSLRFLPLELSE
                143                               160                               180

                182                               202                               222
hBBS1  MEAFVNQHKSN SIKRQTVITMTTLKKNLADEDAVSCLVLGTENKELLVLDPEAFTILAK
6vbu_BBS1 MEAFVNQHKSKSIRRQTVITMTTLKKNLADEDAVSCLVLGTENKELLVLDPEAFTILAK
                200                               220                               240

                242                               262                               282
hBBS1  MSLPSVPVFLVSGQFDVEFRLAAACRNGNIYILRRDSKHPKYCIELSAQPVGLIRVHKV
6vbu_BBS1 MSLPSVPAFLEASGQFDVEFRLAAACRNGSIYILRRDSKRPKYCIELGAQPVGLVGVHKV
                260                               280                               300

                302                               322                               342
hBBS1  LVVGSTQDSLHGFT HKGK LWTVQMPAAIL TMN LLEQHSRGLQAVMAGLANGEVRIYRDK
6vbu_BBS1 LVVGSNQDSLHGFTYKGRRLWTVQMPAAILAMN LLEQHSRGLQAVMAALANEVRIYHDK
                320                               340                               360

                362                               382                               402
hBBS1  ALLNVIHTPDAVTS LCFGRYGRDNTLIMTTRGGGLI I KILKRTAVFVEGGSEVGP PPAQ
6vbu_BBS1 VLLNVIRTPEAVTSLCFGRYGRDNTLIMTTLGGGLI I KILKRTAVFAEGGGEAGPPPSQ
                380                               400                               420

                422                               442                               462
hBBS1  AMKLNVPKTRLYVDQTLREREAGTAMHRAFQTDLYLLR LRAARAYLQALESSLSP LSTT
6vbu_BBS1 AIKLNVPKTRLYVDQTLREREAGTAMHRTFQADLYLLR LRAARAYVQALESSLSPVSLT
                440                               460                               480

                482                               502                               522
hBBS1  AREPLKLHAVVQGLGPTFKLTLHLQNTSTTRPV LGLLVCFLYNEALYSLPRAFFKVPLLV
6vbu_BBS1 AREPLKLHAVVQGLGPTFKLTLHLQNTSTARPI LGLLVCFLYNEVLYALPRAFFKVPLLV
                500                               520                               540

                542                               562                               568
hBBS1  PGLNYPLET FVESLSNKGISDI I KVLVLRREGQSA P LLSAHVNM P GS-----
6vbu_BBS1 PGLNYPLET FVKSLSDKGISDI I KVLVLRREGQST P LLSAHINMPM SEGLAAD
                560                               580                               592

```

B

```

                570                               589                               609                               629
hBBS2  ML L P V F T L K L R H K I S P R M V A I G R Y D G T H P C L A A A T Q T G K V F I H N P H T R N Q H V S A S R V F Q S
6vbu_BBS2 M L Q P V F T L K L R H K I S P R M V A V G R Y D G T H P C L A A A T Q A G K V F I H N P H S R S Q H L G A P R V L Q S
                1                               20                               40                               60

                649                               669                               689
hBBS2  P L E S D V S L L N I N Q A V S C L T A G V L N P E L G Y D A L L V G T Q T N L L A Y D V Y N N S D L F Y R E V A D G A
6vbu_BBS2 P L E S D V S L L N I N Q T V S C L T A G V L N P E L G Y D A L L V G T Q T N L L A Y D V Y N N S D L F Y R E V A D G A
                80                               100                               120

                709                               729                               749
hBBS2  N A I V L G T L G D I S S P L A I I G G N C A L Q G F N H E G S D L F W T V T G D N V N S L A L C D F D G D G K K E L L
6vbu_BBS2 S A I V L G T L G D I T S P L A I I G G N C A L Q G F N H E G N D L F W T V T G D N V H S L A L C D F D G D G K K E L L
                140                               160                               180

                769                               789                               809
hBBS2  V G S E D F D I R V F K E D E I V A E M T E T E I V T S L C P M Y G S R F G Y A L S N G T V G V Y D K T S R Y W R I K S
6vbu_BBS2 V G S E D F D I R V F K E D E I V A E M S E T E I I T S L C P M Y G S R F G Y A L S N G T V G V Y D K T A R Y W R I K S
                200                               220                               240

                829                               849                               869
hBBS2  K N H A M S I H A F D L N S D G V N E L I T G W S N G K V D A R S D R T G E V I F K D N F S S A I A G V V E G D Y R M D
6vbu_BBS2 K N Q A M S I H A F D L N S D G V C E L I T G W S N G K V D A R S D R T G E V I F K D N F S S A I A G V V E G D Y R M E
                260                               280                               300

                889                               909                               929
hBBS2  G H I Q L I C C S V D G E I R G Y L P G T A E M R G N L M D T S A E Q D L I R E L S Q K K Q N L L L E L R N Y E A N A K . . .
6vbu_BBS2 G C Q Q L I C C S V D G E I R G Y L P G T A E M R G N L M D I S V E Q D L I R E L S Q K K Q N L L L E L R N Y E A N A K . . .
                320                               340                               360

```

|           |     |      |      |         |
|-----------|-----|------|------|---------|
| hBBS2     | 930 | 949  | 969  | 969     |
| 6vbu_BBS2 | 361 | 380  | 400  | 420     |
| hBBS2     |     | 989  | 1029 | 1049    |
| 6vbu_BBS2 |     | 440  | 460  | 480     |
| hBBS2     |     | 1069 | 1089 | 1109    |
| 6vbu_BBS2 |     | 500  | 520  | 540     |
| hBBS2     |     | 1129 | 1149 | 1169    |
| 6vbu_BBS2 |     | 560  | 580  | 600     |
| hBBS2     |     | 1189 | 1209 | 1229    |
| 6vbu_BBS2 |     | 620  | 640  | 660     |
| hBBS2     |     | 1249 | 1269 | 1286    |
| 6vbu_BBS2 |     | 680  | 700  | 717 721 |

C

|           |      |         |
|-----------|------|---------|
| hBBS4     | 1288 | 1319    |
| 6vbu_BBS4 | 29   | 60      |
| hBBS4     | 1339 | 1359    |
| 6vbu_BBS4 | 80   | 100 120 |
| hBBS4     | 1399 | 1419    |
| 6vbu_BBS4 | 140  | 160 180 |
| hBBS4     | 1459 | 1479    |
| 6vbu_BBS4 | 200  | 220 240 |
| hBBS4     | 1519 | 1539    |
| 6vbu_BBS4 | 260  | 280 300 |
| hBBS4     | 1579 | 1599    |
| 6vbu_BBS4 | 320  | 340 360 |
| hBBS4     | 1639 | 1659    |
| 6vbu_BBS4 | 380  | 400 420 |
| hBBS4     | 1683 |         |
| 6vbu_BBS4 | 424  |         |
| hBBS4     |      |         |
| 6vbu_BBS4 |      |         |

D

|        |      |         |       |        |            |           |         |           |           |        |       |       |       |       |       |
|--------|------|---------|-------|--------|------------|-----------|---------|-----------|-----------|--------|-------|-------|-------|-------|-------|
| 6VBU_5 | MSVL | DALWEDR | DRVRF | VSSQ   | QMKTRPGEVL | IDCLDS    | VEDTK   | GNNGDRGRL | LVTNLR    | RIV    | WH    | 20    | 40    | 60    |       |
| hBBS5  | MSVL | DALWEDR | DRVRF | LSAQ   | QMKTRPGEVL | IDCLDS    | I       | EDTK      | GNNGDRGRL | LVTNLR | RIL   | WH    | 1704  | 1744  |       |
| 6VBU_5 | SLAL | PRVNL   | SIGY  | NCILN  | ITTRTANS   | KLRGQTEAL | YVLT    | KCNSTR    | FEFIF     | TNLV   | PGSP  | RL    | 80    | 100   |       |
| hBBS5  | SLAL | SRVNV   | SVGY  | NCILN  | ITTRTANS   | KLRGQTEAL | YIL     | KCNSTR    | FEFIF     | TNLV   | PGSP  | RL    | 1764  | 1804  |       |
| 6VBU_5 | YTS  | LI      | AVH   | RAYETS | SKMYR      | DFKLR     | SALIQNK | QLRLL     | PQEN      | VY     | NKING | VWNL  | SSDQ  | GNL   | GT    |
| hBBS5  | FTS  | VM      | AVH   | RAYETS | SKMYR      | DFKLR     | SALIQNK | QLRLL     | PQEH      | VY     | DKING | VWNL  | SSDQ  | GNL   | GT    |
| 6VBU_5 | FITN | VRIV    | WHAM  | NDSFN  | VSI        | PYLQ      | IRSVK   | IRDSK     | FGLAL     | VI     | ESSQ  | SGGY  | VL    | GFK   | ID    |
| hBBS5  | FITN | VRIV    | WHAM  | NDSFN  | VSI        | PYLQ      | IRSIK   | IRDSK     | FGLAL     | VI     | ESSQ  | SGGY  | VL    | GFK   | ID    |
| 6VBU_5 | EKL  | QESV    | KEIN  | SLHK   | VYSAN      | PI        | FGVD    | YEM       | EKPQ      | P      | LEAL  | TVK   | QIQD  | VEI   | DS    |
| hBBS5  | EKL  | QESV    | KEIN  | SLHK   | VYSAN      | PI        | FGVD    | -----     | -----     | -----  | ----- | ----- | ----- | ----- | ----- |
| 6VBU_5 | AYF  | ADGN    | KQQD  | REP    | VFSE       | EL        | GLA     | IEK       | LKDG      | FTL    | QGL   | WE    | V     | M     |       |
| hBBS5  | AYF  | ADGN    | KQQD  | REP    | VFSE       | EL        | GLA     | IEK       | LKDG      | FTL    | QGL   | WE    | V     | S     |       |

E

|        |     |   |    |   |      |      |   |   |   |   |   |   |   |   |   |   |   |   |   |   |   |   |   |   |   |   |   |   |   |   |   |   |   |   |   |   |   |   |   |   |   |   |   |   |   |   |   |    |    |    |   |   |   |      |      |      |      |      |      |      |      |      |
|--------|-----|---|----|---|------|------|---|---|---|---|---|---|---|---|---|---|---|---|---|---|---|---|---|---|---|---|---|---|---|---|---|---|---|---|---|---|---|---|---|---|---|---|---|---|---|---|---|----|----|----|---|---|---|------|------|------|------|------|------|------|------|------|
| 6VBU_7 | MDL | N | LN | R | ADYL | QVGV | T | S | Q | K | T | M | K | L | P | A | S | K | H | R | A | T | Q | K | V | V | G | D | H | G | I | V | M | C | F | G | M | K | K | G | E | A | V | T | V | F | K | 20 | 40 | 60 |   |   |   |      |      |      |      |      |      |      |      |      |
| hBBS7  | MDL | I | L  | N | R    | M    | D | Y | L | O | V | G | V | T | S | O | K | T | M | K | L | P | A | S | R | H | R | A | T | O | K | V | V | I | G | D | H | G | V | M | C | F | G | M | K | K | G | E  | A  | A  | V | F | K | 2045 | 2065 | 2085 |      |      |      |      |      |      |
| 6VBU_7 | LPG | Q | K  | I | A    | R    | L | E | L | G | G | A | L | N | T | P | Q | E | K | I | F | I | A | A | G | S | E | I | R | G | F | T | K | R | G | K | O | F | L | S | F | E | T | N | L | T | E | S  | I  | K  | A | M | H | I    | S    | G    | S    | D    | 80   | 100  |      |      |
| hBBS7  | LPG | P | K  | I | A    | R    | L | E | L | G | G | V | I | N | T | P | Q | E | K | I | F | I | A | A | S | E | I | R | G | F | T | K | R | G | K | O | F | L | S | F | E | T | N | L | T | E | S | I  | K  | A  | M | H | I | S    | G    | S    | D    | 2105 | 2125 | 2145 |      |      |
| 6VBU_7 | L   | F | L  | S | A    | S    | I | Y | N | H | Y | C | D | K | D | Q | H | Y | L | S | G | D | K | I | N | D | V | I | C | L | P | V | E | R | L | L | R | E | V | P | V | L | A | C | Q | D | R | V  | L  | R  | V | L | Q | G    | S    | D    | 140  | 160  |      |      |      |      |
| hBBS7  | L   | F | L  | S | A    | S    | I | Y | N | H | Y | C | D | K | D | Q | H | Y | L | S | G | D | K | I | N | D | V | I | C | L | P | V | E | R | L | S | R | I | T | P | V | L | A | C | Q | D | R | V  | L  | R  | V | L | Q | G    | S    | D    | 2165 | 2185 | 2205 |      |      |      |
| 6VBU_7 | T   | Y | E  | I | E    | V    | P | G | P | P | T | V | L | A | L | H | N | G | G | D | S | G | E | D | L | L | F | G | T | S | D | G | K | L | G | L | I | Q | I | T | T | S | K | P | I | H | K | W  | E  | I  | R | N | E | K    | K    | R    | G    | 200  | 220  |      |      |      |
| hBBS7  | M   | Y | A  | V | E    | V    | P | G | P | P | T | V | L | A | L | H | N | G | G | D | S | G | E | D | L | L | F | G | T | S | D | G | K | L | L | A | L | I | Q | I | T | T | S | K | P | V | R | K  | W  | E  | I | Q | N | E    | K    | K    | R    | G    | 2225 | 2245 | 2265 |      |
| 6VBU_7 | I   | L | C  | V | D    | S    | F | D | I | V | G | D | G | V | K | D | L | L | V | G | R | D | D | G | M | V | E | V | Y | G | F | D | N | A | N | E | P | V | L | R | F | D | H | T | L | S | E | S  | V  | T  | S | I | Q | G    | G    | C    | V    | G    | K    | 260  | 280  |      |
| hBBS7  | I   | L | C  | I | D    | S    | F | D | I | V | G | D | G | V | K | D | L | L | V | G | R | D | D | G | M | V | E | V | S | F | D | N | A | N | E | P | V | L | R | F | D | Q | M | L | S | E | S | V  | T  | S  | I | Q | G | G    | C    | V    | G    | K    | 2285 | 2305 | 2325 |      |
| 6VBU_7 | G   | Y | D  | E | I    | V    | V | S | T | Y | S | G | W | I | T | G | L | T | T | E | P | V | H | K | E | S | G | P | G | E | E | L | K | F | N | Q | E | M | Q | N | K | I | S | S | L | R | N | E  | L  | Q  | L | Q | Y | K    | V    | L    | Q    | E    | R    | 320  | 340  |      |
| hBBS7  | S   | Y | D  | E | I    | V    | V | S | T | Y | S | G | W | V | T | G | L | T | T | E | P | I | H | K | E | S | G | P | G | E | E | L | K | I | N | Q | E | M | Q | N | K | I | S | S | L | R | N | E  | L  | H  | L | Q | Y | K    | V    | L    | Q    | E    | R    | 2345 | 2365 | 2385 |
| 6VBU_7 | E   | K | Y  | Q | S    | S    | Q | S | S | K | A | S | A | V | P | S | F | S | V | N | D | K | F | T | L | N | K | D | A | S | Y | S | L | I | L | E | V | Q | T | A | I | D | N | V | L | I | Q | S  | D  | V  | P | I | D | L    | L    | D    | 380  | 400  |      |      |      |      |
| hBBS7  | E   | N | Y  | Q | S    | S    | Q | S | S | K | A | S | A | V | P | S | F | G | I | N | D | K | F | T | L | N | K | D | A | S | Y | S | L | I | L | E | V | Q | T | A | I | D | N | V | L | I | Q | S  | D  | V  | P | I | D | L    | D    | 2405 | 2425 | 2445 |      |      |      |      |
| 6VBU_7 | D   | K | N  | S | A    | V    | S | F | S | C | D | S | E | S | N | D | N | F | L | L | A | T | Y | R | C | Q | A | N | T | T | R | L | E | L | K | I | R | S | I | E | G | Q | Y | G | T | L | Q | A  | Y  | V  | T | P | R | I    | Q    | P    | K    | 440  | 460  |      |      |      |
| hBBS7  | D   | K | N  | S | A    | V    | S | F | S | C | D | S | E | S | N | D | N | F | L | L | A | T | Y | R | C | Q | A | D | T | T | R | L | E | L | K | I | R | S | I | E | G | Q | Y | G | T | L | Q | A  | Y  | V  | T | P | R | I    | Q    | P    | K    | 2465 | 2485 | 2505 |      |      |
| 6VBU_7 | C   | Q | V  | R | Q    | Y    | H | I | K | P | L | S | L | H | Q | R | T | H | F | I | D | H | R | P | M | N | T | L | T | L | T | G | Q | F | S | F | S | E | L | H | S | W | V | V | F | C | M | P  | E  | V  | P | E | K | P    | P    | A    | G    | E    | C    | 500  | 520  |      |
| hBBS7  | C   | Q | V  | R | Q    | Y    | H | I | K | P | L | S | L | H | Q | R | T | H | F | I | D | H | R | P | M | N | T | L | T | L | T | G | Q | F | S | F | A | E | V | H | S | W | V | V | F | C | L | P  | E  | V  | P | E | K | P    | P    | A    | G    | E    | C    | 2525 | 2545 | 2565 |
| 6VBU_7 | V   | T | F  | Y | F    | Q    | N | T | F | L | D | T | Q | L | E | S | T | Y | R | K | G | E | G | V | F | K | S | D | N | I | S | I | S | I | L | K | D | V | L | S | K | E | A | T | K | R | K | I  | N  | L  | N | I | S | Y    | E    | I    | N    | E    | V    | 560  | 580  |      |
| hBBS7  | V   | T | F  | Y | F    | Q    | N | T | F | L | D | T | Q | L | E | S | T | Y | R | K | G | E | G | V | F | K | S | D | N | I | S | I | S | I | L | K | D | V | L | S | K | E | A | T | K | R | K | I  | N  | L  | N | I | S | Y    | E    | I    | N    | E    | V    | 2585 | 2605 | 2625 |



6VBU\_7 SVKHTLKL IHPKLEYQLLAKKVQLIDALKEQVHEGNTNFLIPEYRCILEEADHLQEEY 660  
hBBS7 SVKHTLKL IHPKLEYQLLAKKVQLIDALKEQVHEGNTNFLIPEYHCILEEADHLQEEY 2685

6VBU\_7 KKQPAHLERLYGMITDLFIDKFKFKGTNVKTKVPLLEILDSYDQNALIAFFDAA 715  
hBBS7 KKQPAHLERLYGMITDLFIDKFKFKGTNVKTKVPLLEILDSYDQNALISFFDAA 2740

F

6VBU\_BBS8 MEPLLLAWSYFRRRKFQLCADLCTQMLEKSPCDQAAWILKARALTEMVYVEIDVDEEGI 60  
hBBS8 MEPLLLAWSYFRRRKFQLCADLCTQMLEKSPYDQAAWILKARALTEMVYIDEIDVDQEGIT 2800

6VBU\_BBS8 AEMILDENAIQVPRPGTSLKLPGTNQTGGPSPAVRPVTQAGRPIITGFLRPSTQSGRPGT 120  
hBBS8 AEMMLDENAIQVPRPGTSLKLPGTNQTGGPSPQAVRPITQAGRPIITGFLRPSTQSGRPGT 2860

6VBU\_BBS8 IEQAIKTPRTAYTARPIASSSGRFVRLGTASMLTSPDGPFINLSRLNLAKYAQKPKLAKA 180  
hBBS8 MEQAIKTPRTAYTARPIASSSGRFVRLGTASMLTSPDGPFINLSRLNLTKYSQKPKLAKA 2920

6VBU\_BBS8 LFEYIFHHENDVK TALDLAALSTEHSQYKDWWMKVQIGKCYRRLGLYREAEKQFKSALKQ 240  
hBBS8 LFEYIFHHENDVK TALDLAALSTEHSQYKDWWMKVQIGKCYRRLGLYREAEKQFKSALKQ 2980

6VBU\_BBS8 QEMVDTFLYLAKVYISLDQPLTALNLFKQGLDKFPGEVTL LCGIARIYEEMNMISSATEY 300  
hBBS8 QEMVDTFLYLAKVYISLDQPV TALNLFKQGLDKFPGEVTL LCGIARIYEEMNMISSAAEY 3040

6VBU\_BBS8 YKEVLKQDNTHVEAIAICIGSNHFYTDQPEVALRFYRRLQMGVYVYNQLFNNLGLCCFYAQ 360  
hBBS8 YKEVLKQDNTHVEAIAICIGSNHFYSDQPEIALRFYRRLQMGVIYVYNQLFNNLGLCCFYAQ 3100

6VBU\_BBS8 QYDMTLTSFERALS LAENEEVADVWYNLGHVAVGTGDTNLAHQCFRLALVSNNOHAEAY 420  
hBBS8 QYDMTLTSFERALS LAENEEAADVWYNLGHVAVGIGDTNLAHQCFRLALVNNNHAEAY 3160

6VBU\_BBS8 NNLA VLEMRRGHVEQAKALLQTASSLAPHMYEPHFNFATISDKIGDLQRSYAAAKKSEAA 480  
hBBS8 NNLA VLEMRRGHVEQARALLQTASSLAPHMYEPHFNFATISDKIGDLQRSYVAAQKSEAA 3220

6VBU\_BBS8 FPDHVD TQHLIKQLEQHFAML 500  
hBBS8 FPDHVD TQHLIKQLRQHF A-- 3240

G

6VBU\_BBS9 MSLFKARDWSTV LGDKEEFDQGC LCLADV DNTGNGQDKIIVGSFMGYLRIFNPHPVKGTG 60  
hBBS9 -SLFKARDWSTV LGDKEEFDOGC LCLANVDNSNGGODKIIVGSFMGYLRIFSPHPAKGTG 3300

6VBU\_BBS9 DGAQAEDLLLEVHLRDPILQVEVGK FVSGTEMLHLAVLHSRKL CVYSVSGTLGNVHEHGNQ 120  
hBBS9 DGAQAEDLLLEVDLRDPV LQVEVGK FVSGTEMLHLAVLHSRKL CVYSVSGTLGNVHEHGNQ 3360

6VBU\_BBS9 YQIKLMEYHNLRQTACNMTYGSFSGGVKGRDLICIQSVDGMLMVFEEQESYAFGRFLPGSLL 180  
hBBS9 CQMKLMEYHNLRQTACNMTYGSFSGGVKGRDLICIQSMDGMLMVFEEQESYAFGRFLPGFLL 3420

6VBU\_BBS9 PGPLAYSSRTDSF IIVSSCHQVESYKYQVLAFATDADKROETEQQKHGSGKRLVVDWTLN 240  
hBBS9 PGPLAYSSRTDSF LTVSSCQVESYKYQVLAFATDADKROETEQQKLGSGKRLVVDWTLN 3480

6VBU\_BBS9 IGEQAIDICIVSFIQSASSVFLGERNFFCLKDNGQIQFMKKLDYSPSCFLPYCSVSEGT 300  
hBBS9 IGEQALDICIVSFNQSSASSVFLGERNFFCLKDNGQIRFMKKLDWSPSCFLPYCSVSEGT 3540

6VBU\_BBS9 INTLIGNHNMLHIYQDVT LKQWATQLPHVPVAVRVGCLHDLKGVIVT L SDDGHLQCSYLG 360  
hBBS9 INTLIGNHNMLHIYQDVT LKQWATQLPHIPVAVRVGCLHDLKGVIVT L SDDGHLQCSYLG 3600



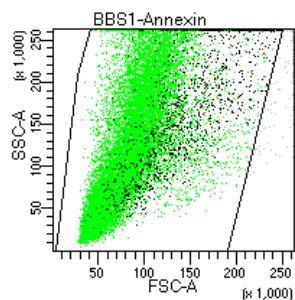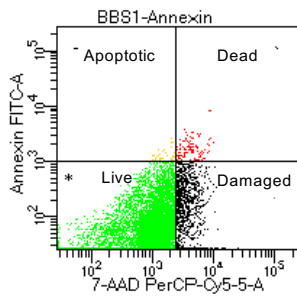

| Tube: Annexin |         |         |        |
|---------------|---------|---------|--------|
| Population    | #Events | %Parent | %Total |
| All Events    | 20,000  | ####    | 100.0  |
| Cells         | 19,430  | 97.2    | 97.2   |
| - Apoptotic   | 38      | 0.2     | 0.2    |
| Dead          | 109     | 0.6     | 0.5    |
| * Live        | 18,102  | 93.2    | 90.5   |
| ; Damaged     | 1,181   | 6.1     | 5.9    |

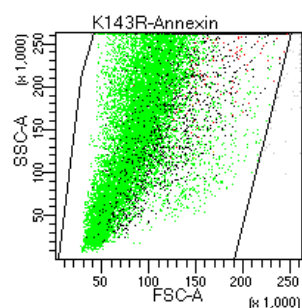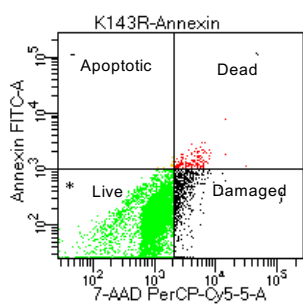

| Tube: Annexin |         |         |        |
|---------------|---------|---------|--------|
| Population    | #Events | %Parent | %Total |
| All Events    | 20,000  | ####    | 100.0  |
| Cells         | 19,205  | 96.0    | 96.0   |
| - Apoptotic   | 19      | 0.1     | 0.1    |
| Dead          | 256     | 1.3     | 1.3    |
| * Live        | 17,714  | 92.2    | 88.6   |
| ; Damaged     | 1,216   | 6.3     | 6.1    |

**Appendix Figure S6:** ARPE-19 cells were transiently transfected with Myc-tagged BBS1 variants or Myc-tagged BBS1- K143R. After 24h from transfection, cells were harvested and analyzed using a fluorescein isothiocyanate (FITC) Annexin V Apoptosis Detection Kit and 7-AAD staining solution, according to the manufacturer's protocol.
